# Supplementary material for: Na3(VO)(PO4)(CO3): a synthetic member of the bradleyite phosphate carbonate family with a new type of crystal structure
Source: Royal Society of Chemistry journal article supplement (doi:10.1039/d3ce00323j), 2023-01-01
Supplement: d3ce00323j1.pdf [file d3ce00323j1.pdf]

## SUPPORTING INFORMATION

### **Na<sub>3</sub>(VO)(PO<sub>4</sub>)(CO<sub>3</sub>): a synthetic member of the bradleyite phosphate carbonate family with a new type of crystal structure**

Olga Yakubovich,<sup>\*a</sup> Galina Kiriukhina,<sup>a,b</sup> Sergey Simonov,<sup>c</sup> Anatoly Volkov<sup>d</sup> and Olga Dimitrova<sup>a</sup>

<sup>a</sup>*Lomonosov Moscow State University, Moscow, 119991, Russia.*

<sup>b</sup>*Korzhinskii Institute of Experimental Mineralogy RAS, Chernogolovka, Moscow region, 142432, Russia.*

<sup>c</sup>*Institute of Solid State Physics RAS, Chernogolovka, Moscow region, 142432, Russia.*

<sup>d</sup>*Skolkovo Institute of Science and Technology, Moscow, 121205, Russia.*

*E-mail: yakubovich.olga320@gmail.com*

**Table S1.** Na<sub>3</sub>(VO)[PO<sub>4</sub>][CO<sub>3</sub>]. Atomic coordinates and equivalent isotropic displacement parameters (Å<sup>2</sup> × 10<sup>3</sup>).  $U_{(eq)}$  is defined as one third of the trace of the orthogonalized  $U_{ij}$  tensor.

| Atom | $x/a$       | $y/b$       | $z/c$        | $U_{(eq)}$  |
|------|-------------|-------------|--------------|-------------|
| V    | 0.47387(6)  | 0.25        | 0.22774(4)   | 0.00481(8)  |
| P    | 0.54775(9)  | 0.25        | -0.12178(6)  | 0.00559(11) |
| Na1  | 0.29437(15) | 0.25        | 0.52688(10)  | 0.01133(18) |
| Na2  | 1.07052(11) | 0.49294(14) | 0.82776(7)   | 0.01190(14) |
| C    | 0.8254(3)   | 0.25        | 0.4824(2)    | 0.0064(4)   |
| O1   | 0.6168(3)   | 0.25        | 0.47073(18)  | 0.0094(3)   |
| O2   | 0.9833(3)   | 0.25        | 0.6156(2)    | 0.0091(3)   |
| O3   | 0.4650(2)   | 0.0567(2)   | -0.23280(12) | 0.0090(2)   |
| O4   | 0.8586(3)   | 0.25        | 0.3467(2)    | 0.0090(3)   |
| O5   | 0.4129(3)   | 0.25        | -0.0056(2)   | 0.0108(3)   |
| O6   | 0.7990(3)   | 0.25        | -0.0343(2)   | 0.0107(3)   |
| O7   | 0.2237(3)   | 0.25        | 0.2351(2)    | 0.0092(3)   |
